# Supplementary material for: Downregulation of death receptor 4 is tightly associated with positive response of EGFR mutant lung cancer to EGFR-targeted therapy and improved prognosis
Source: PubMed Central journal article supplement (PMC7914351; doi:10.7150/thno.54824), 2021-02-15
Supplement: thnov11p3964s1.pdf [file thnov11p3964s1.pdf]

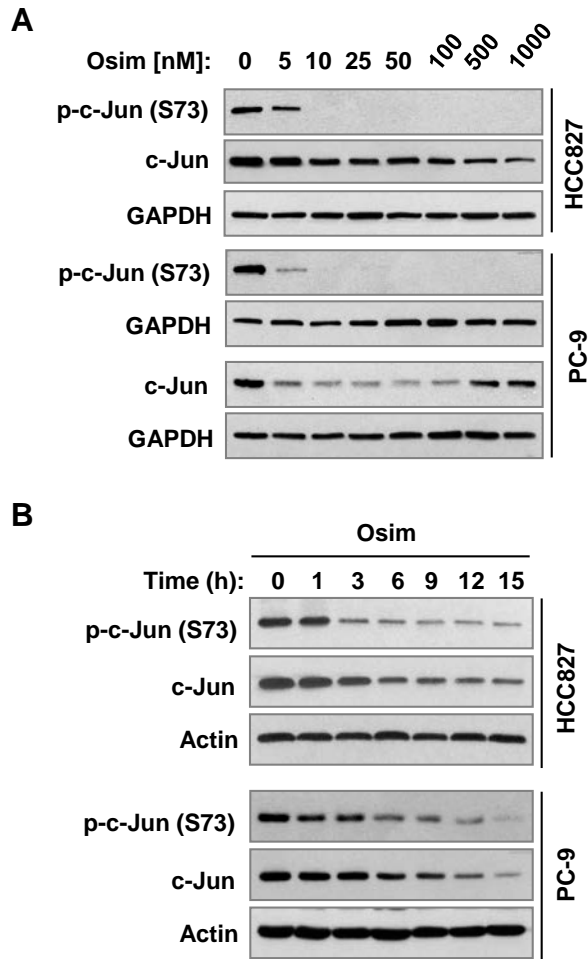

**Figure S1. Osimertinib decreases the levels of c-Jun and p-c-Jun in EGFRm NSCLC cells.** The indicated cell lines were exposed to different concentrations of osimertinib (Osim) for 12 h (A) or to 100 nM osimertinib1 for different times (B). The given proteins were detected with Western blotting.

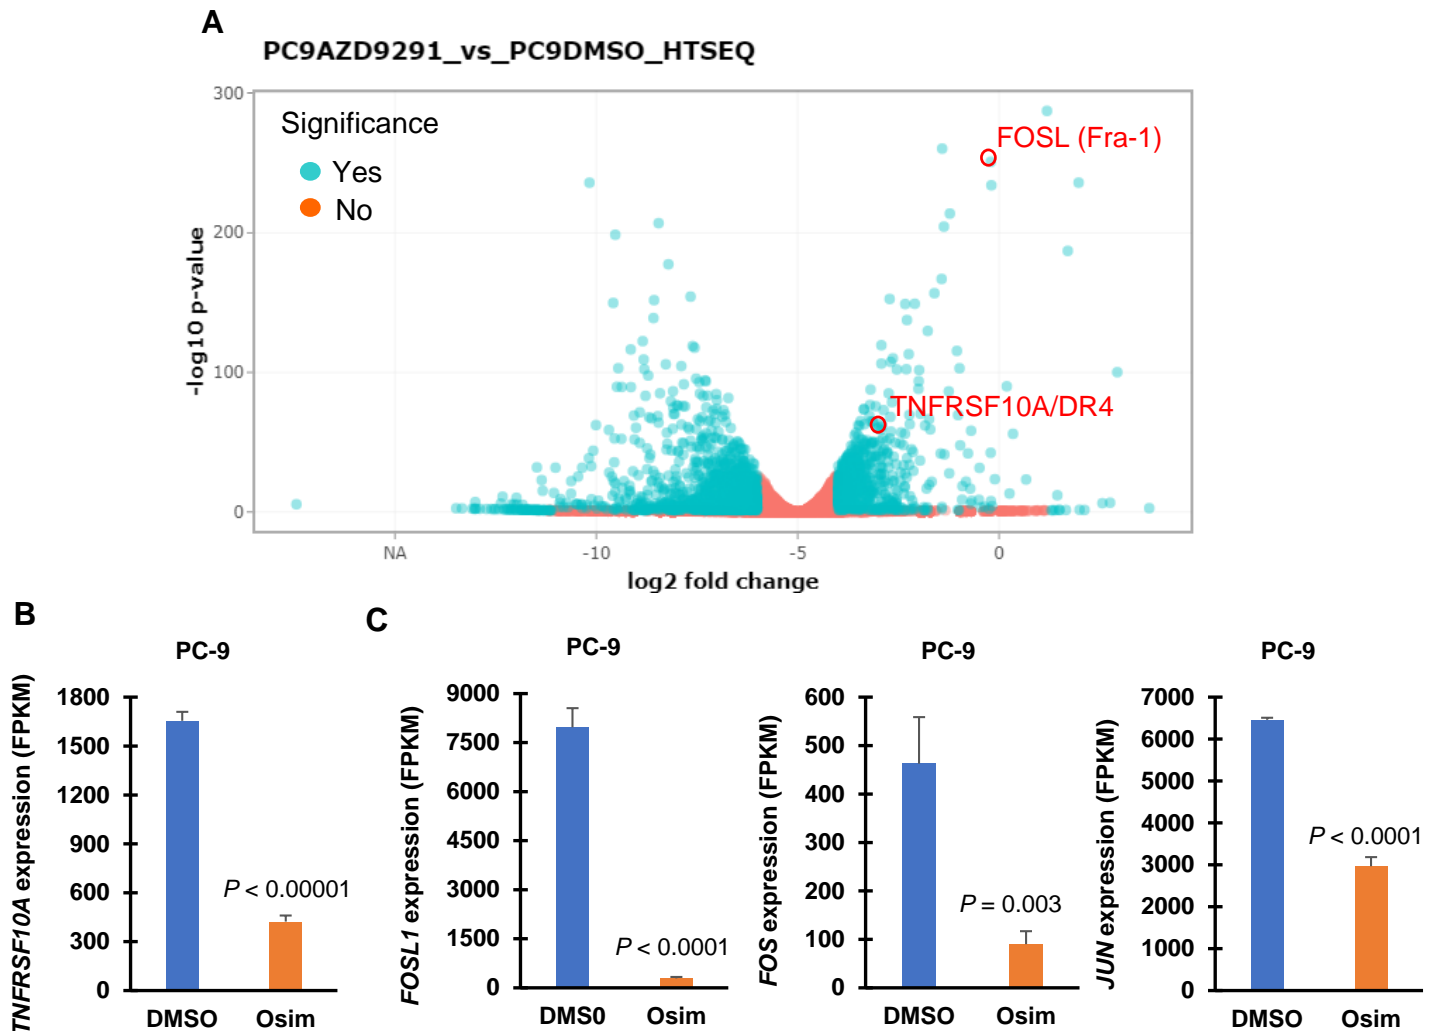

**Figure S2. Downregulated expression of DR4 (*TNFRSF10A*) and other AP-1 associated genes in osimertinib-treated EGFR<sup>m</sup> NSCLC cells detected in RNA-seq analysis.** PC-9 cells were exposed to DMSO or 100 nM osimertinib (Osim) for 14 h and then harvested for RNA-seq analysis. The expression values for each gene were presented in FPKM (fragments per kilobase per million) units.

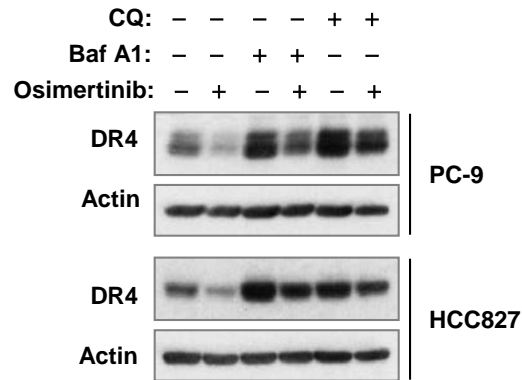

**Figure S3. The lysosomal inhibitors partially or minimally rescue DR4 reduction induced by osimertinib in EGFRm NSCLC cells.** The indicated cells were pre-treated with 20  $\mu$ M CQ or 50 nM Baf A1 for 1 h and then co-treated with 100 nM osimertinib for an additional 6 h. Total cellular DR4 and other proteins were detected with Western blotting.

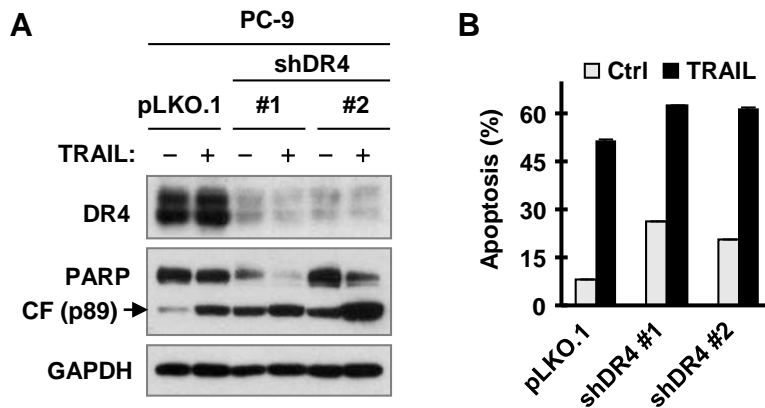

**Figure S4. DR4 knockdown enhances TRAIL-induced apoptosis.** PC-9 cells were infected with DR4 shRNA lentiviruses for 36 h followed by treatment with 15 ng/ml TRAIL for another 12 h. DR4 expression and PARP cleavage were detected by Western blotting (A) and apoptosis was measured by annexin V/flow cytometry (B). The data are means  $\pm$  SDs of duplicate determinations (B). CF, cleaved form.

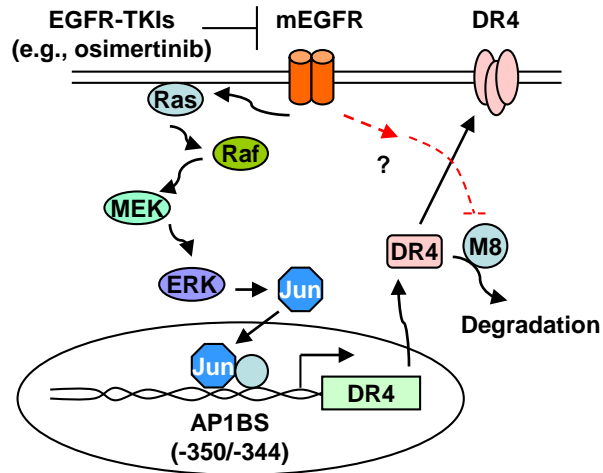

**Figure S5. A working model for DR4 suppression by EGFR-TKIs such as osimertinib involving both transcriptional and post-translational mechanisms. M8, MARCH8. BS, binding site.**

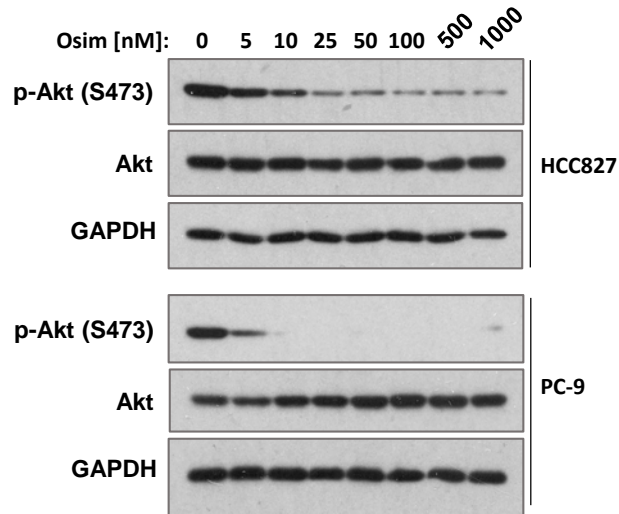

**Figure S6. Osimertinib suppresses Akt phosphorylation in EGFRm NSCLC cell lines.** Both PC-9 and HCC827 cell lines were exposed to different concentrations of osimertinib (Osim) as indicated for 8 h. The interested proteins were detected with Western blotting.

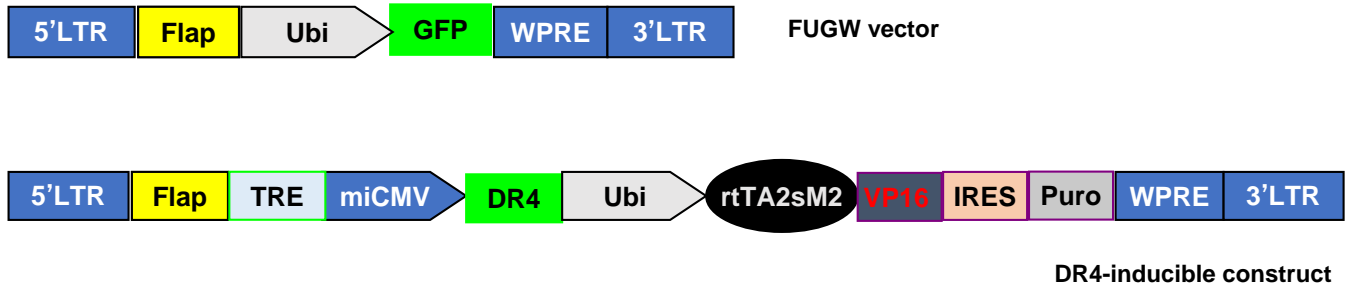

**Figure S7. Schema for the construction of lentiviral inducible DR4 expression plasmid based using FUGW vector as backbone.** All individual fragments were amplified by PCR and inserted into backbone vector.

**Table S1. Clinical features of 242 cases of lung adenocarcinoma**

| Patients characteristics   | No. of patients (%) |
|----------------------------|---------------------|
| <b>Age (years)</b>         |                     |
| ≤ 50                       | 109 (45.0)          |
| >50                        | 133 (55.0)          |
| <b>Gender</b>              |                     |
| Male                       | 142 (58.7)          |
| Female                     | 100 (41.3)          |
| <b>Clinical stages</b>     |                     |
| Stage I                    | 9 (3.7)             |
| Stage II                   | 62 (25.6)           |
| Stage III                  | 131 (54.1)          |
| Stage IV                   | 40 (16.6)           |
| <b>Lymph node status</b>   |                     |
| N0                         | 82 (33.9)           |
| N1/N2/N3                   | 160 (66.1)          |
| <b>Pathological grades</b> |                     |
| Well                       | 16 (6.6)            |
| Moderate                   | 89 (36.8)           |
| Poor                       | 137 (56.6)          |
| <b>Survival status</b>     |                     |
| Live                       | 161 (66.5)          |
| Death                      | 81 (33.5)           |



**Table S2. Summary of multivariate analysis of Cox proportional regression for overall survival in 242 cases of lung adenocarcinoma**

| Parameter          | B     | SE   | Wald   | Sig.   | Exp (B) | 95% CI for Exp (B) |       |
|--------------------|-------|------|--------|--------|---------|--------------------|-------|
|                    |       |      |        |        |         | Lower              | Upper |
| Age                | -.059 | .246 | 0.57   | .811   | .943    | 0.582              | 1.528 |
| Gender             | .000  | .236 | .000   | .999   | 1.000   | .630               | 1.589 |
| Treatments         | -.237 | .133 | 3.152  | .076   | .789    | .607               | 1.025 |
| Clinical stages    | .539  | .136 | 15.756 | .0001* | 1.715   | 1.314              | 2.238 |
| Pathological grade | .753  | .237 | 10.096 | .001*  | 2.122   | 1.334              | 3.376 |
| DR4 expression     | .969  | .260 | 13.859 | .0001* | 2.635   | 1.582              | 4.389 |

Abbreviations: CI, confidence interval; B, beta coefficient; SE, standard error; Sig., significance; Exp (B), exponentiation of the B coefficient.

\*, statistically significant in multivariate analysis of Cox regression.

**Table S3. Association between DR4 expression and EGFR mutation status in lung adenocarcinoma (n=124)**

|      |        |       | DR4       |           |                        |
|------|--------|-------|-----------|-----------|------------------------|
|      |        |       | Negative  | Positive  | <i>P</i> -values (Sig) |
| EGFR | WT     | N (%) | 35 (68.6) | 16 (31.4) | 1.876 (0.171)          |
|      | Mutant | N (%) | 58 (79.5) | 15 (20.5) |                        |
